# Supplementary material for: School-based high-intensity interval training programs in children and adolescents: A systematic review and meta-analysis
Source: PubMed Central journal article supplement (PMC9067698; doi:10.1371/journal.pone.0266427), 2022-05-04
Supplement: pone.0266427.s003.pdf [file pone.0266427.s003.pdf]

## Supplement 3: Body Composition Forest Plots

### 1. Forest plot of high-intensity interval training versus control for waist circumference

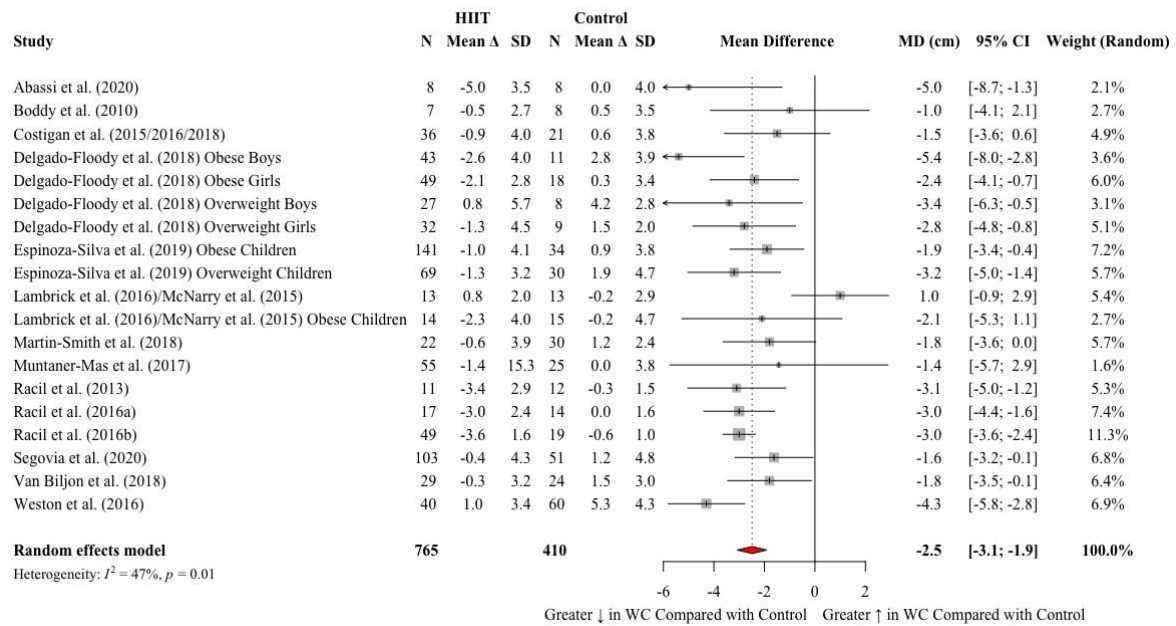

The mean difference between the change scores for high-intensity interval training (HIIT) and the control groups in centimetres

$N$  = number of participants

Mean  $\Delta$  = change score between pre- and post-tests

SD = standard deviation of the change score

MD = mean difference between the HIIT and control groups

CI = confidence interval

WC = waist circumference

$I^2$  = variation across studies due to heterogeneity rather than chance

### 2. Forest plot of high-intensity interval training versus control for body fat percentage

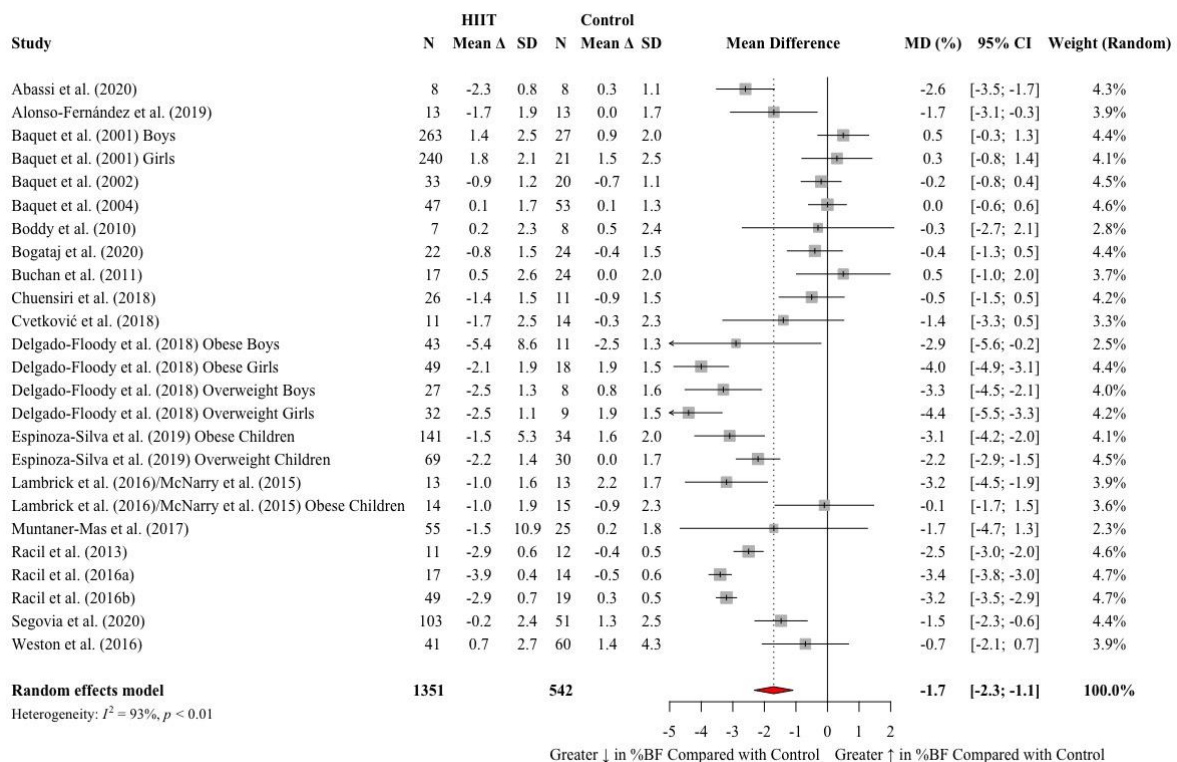

The mean difference between the change scores for high-intensity interval training (HIIT) and the control groups in percentage

$N$  = number of participants

Mean  $\Delta$  = change score between pre- and post-tests

SD = standard deviation of the change score

MD = mean difference between the HIIT and control groups

CI = confidence interval

%BF = percentage of body fat

$I^2$  = variation across studies due to heterogeneity rather than chance

### 3. Forest plot of high-intensity interval training versus control for body mass index

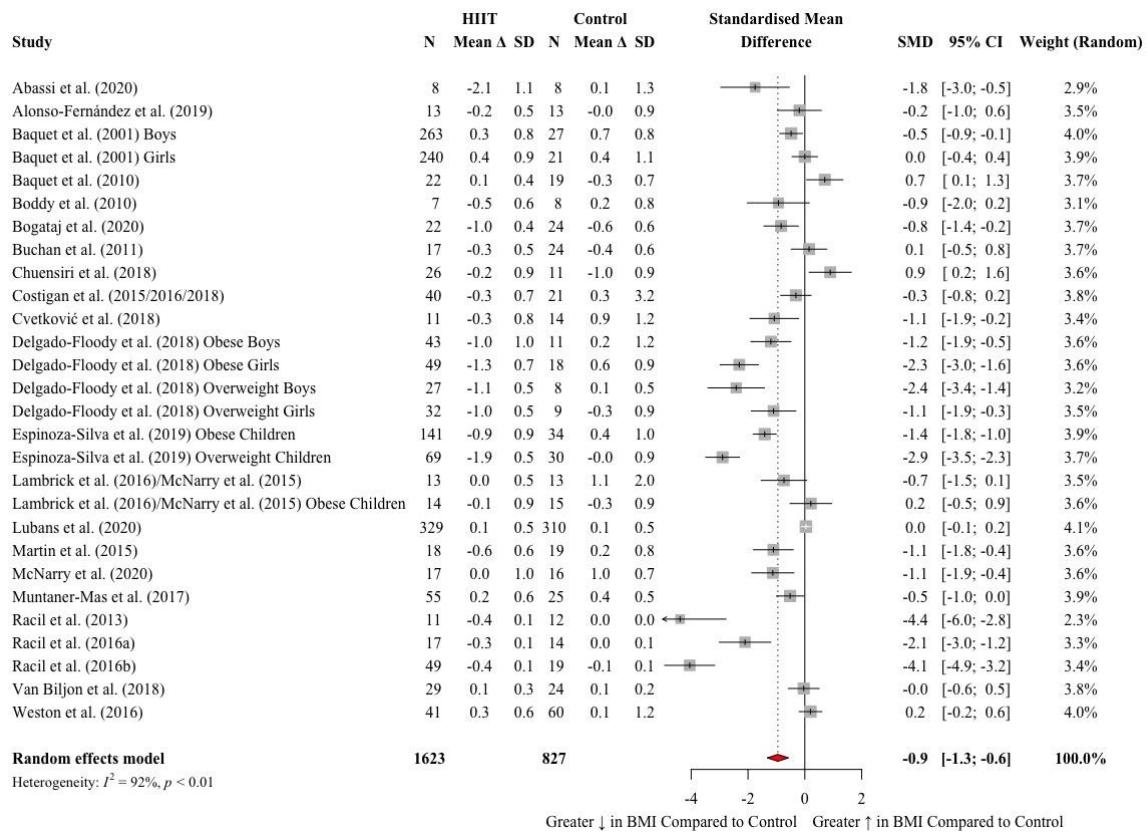

The standardised mean difference (SMD) between the change scores for high-intensity interval training (HIIT) and the control groups. SMD was used to account for numbers expressed as  $\text{kg}/\text{m}^2$  and as z-scores.

$N$  = number of participants

Mean  $\Delta$  = change score between pre- and post-tests

SD = standard deviation of the change score

SMD = standardised mean difference between the HIIT and control groups

CI = confidence interval

BMI = body mass index

$I^2$  = variation across studies due to heterogeneity rather than chance

### 4. Forest plot of high-intensity interval training versus control for muscle mass

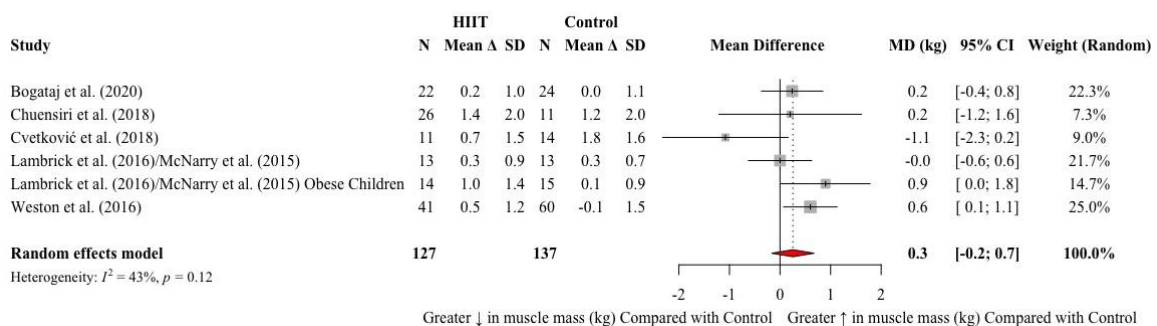

The mean difference between the change scores for high-intensity interval training (HIIT) and the control groups in kilograms

$N$  = number of participants

Mean  $\Delta$  = change score between pre- and post-tests

SD = standard deviation of the change score

MD = mean difference between the HIIT and control groups

CI = confidence interval

$I^2$  = variation across studies due to heterogeneity rather than chance

## 5. Forest plot of high-intensity interval training versus control for lean mass

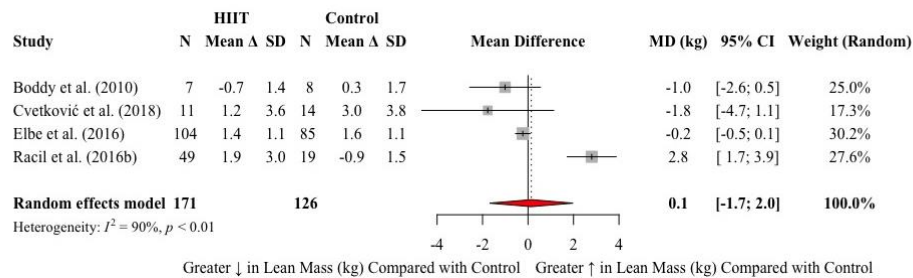

The mean difference between the change scores for high-intensity interval training (HIIT) and the control groups in kilograms

$N$  = number of participants

Mean  $\Delta$  = change score between pre- and post-tests

SD = standard deviation of the change score

MD = mean difference between the HIIT and control groups

CI = confidence interval

$I^2$  = variation across studies due to heterogeneity rather than chance

## Cardiovascular Health Forest Plots

### 1. Forest plot of high-intensity interval training versus control for systolic blood pressure

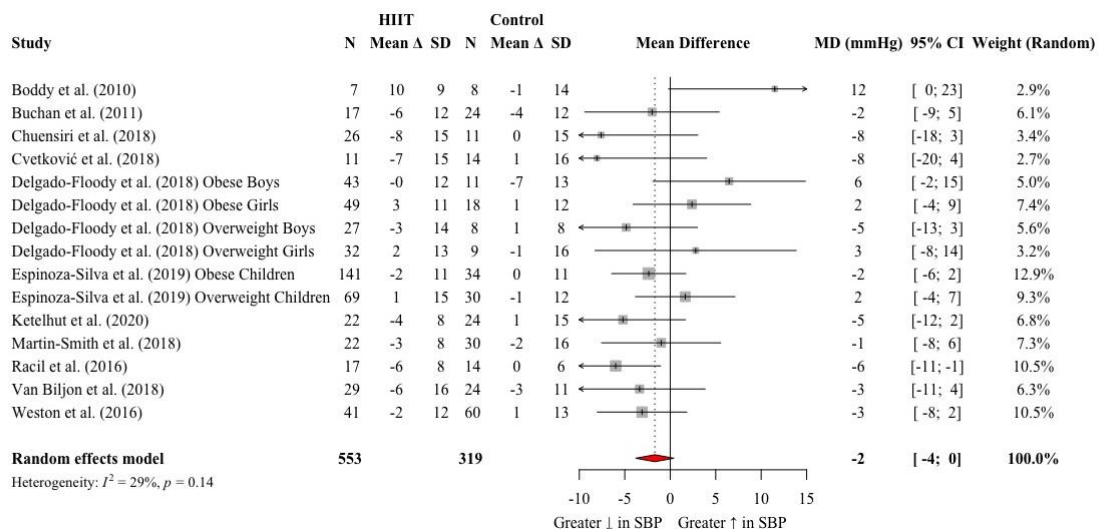

The mean difference between the change scores for high-intensity interval training (HIIT) and the control groups in millimetres of mercury.

$N$  = number of participants

Mean  $\Delta$  = change score between pre- and post-tests

SD = standard deviation of the change score

MD = mean difference between the HIIT and control groups

CI = confidence interval

SBP = systolic blood pressure

mmHg = millimetres of mercury

$I^2$  = variation across studies due to heterogeneity rather than chance

## 2. Forest plot of high-intensity interval training versus control for diastolic blood pressure

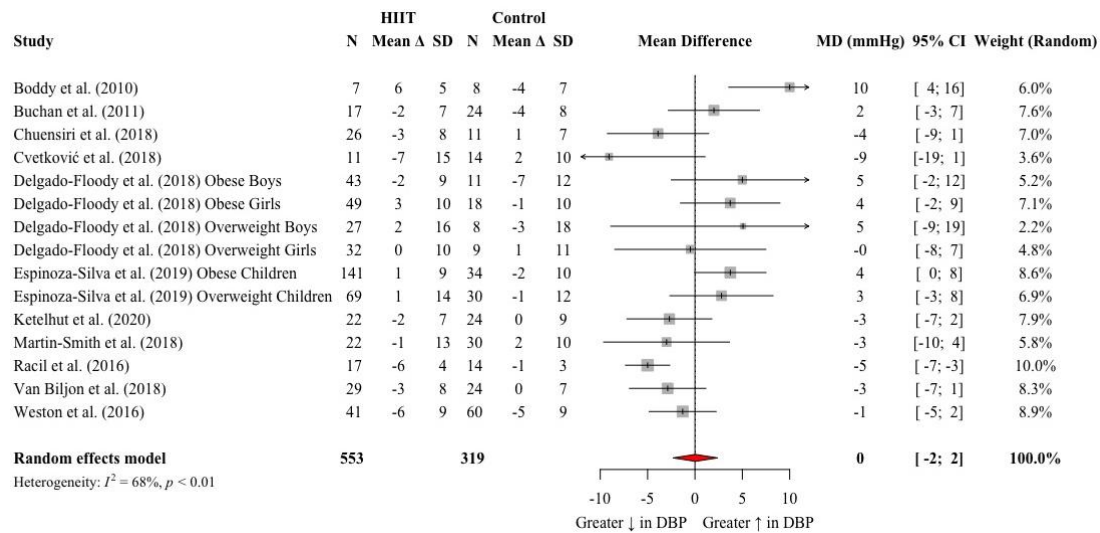

The mean difference between the change scores for high-intensity interval training (HIIT) and the control groups in millimetres of mercury.

$N$  = number of participants

Mean  $\Delta$  = change score between pre- and post-tests

SD = standard deviation of the change score

MD = mean difference between the HIIT and control groups

CI = confidence interval

DBP = diastolic blood pressure

mmHg = millimetres of mercury

$I^2$  = variation across studies due to heterogeneity rather than chance

## 3. Forest plot of high-intensity interval training versus control for resting heart rate

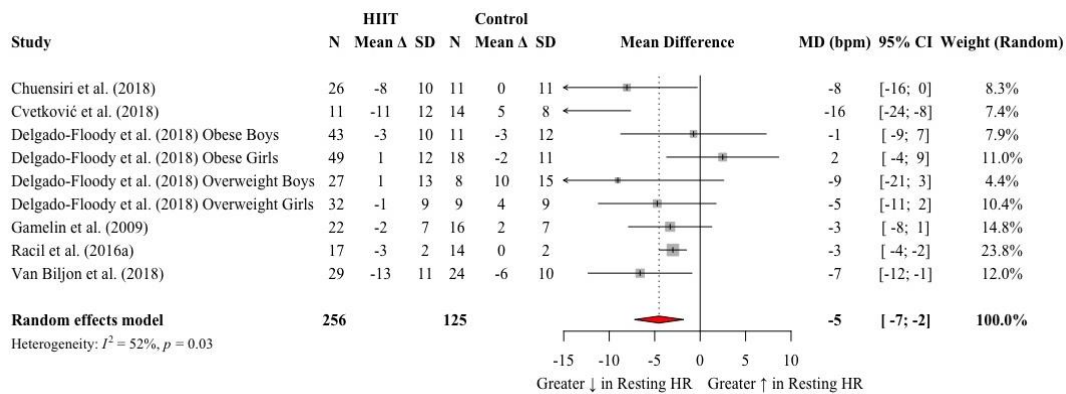

The mean difference between the change scores for high-intensity interval training (HIIT) and the control groups in beats per minute.

$N$  = number of participants

Mean  $\Delta$  = change score between pre- and post-tests

SD = standard deviation of the change score

MD = mean difference between the HIIT and control groups

CI = confidence interval

HR = systolic blood pressure

Bpm = beats per minute

$I^2$  = variation across studies due to heterogeneity rather than chance



# Blood Profile Forest Plots

## 1. Forest plot of high-intensity interval training versus control for fasting glucose

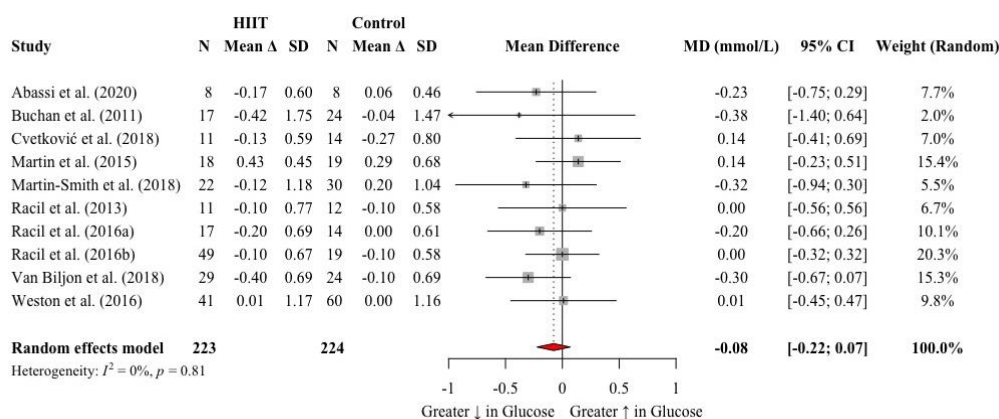

The mean difference between the change scores for high-intensity interval training (HIIT) and the control groups in millimoles per litre.

$N$  = number of participants

Mean  $\Delta$  = change score between pre- and post-tests

SD = standard deviation of the change score

MD = mean difference between the HIIT and control groups

CI = confidence interval

Mmol/L = millimoles per litre

$I^2$  = variation across studies due to heterogeneity rather than chance

## 2. Forest plot of high-intensity interval training versus control for fasting insulin

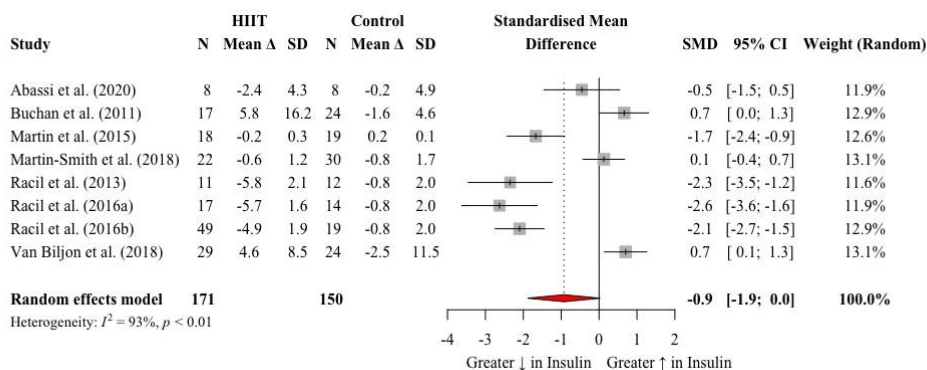

The standardised mean difference (SMD) between the change scores for high-intensity interval training (HIIT) and the control groups. SMD was used to account for different units of measurement presented.

$N$  = number of participants

Mean  $\Delta$  = change score between pre- and post-tests

SD = standard deviation of the change score

SMD = standardised mean difference between the HIIT and control groups

CI = confidence interval

$I^2$  = variation across studies due to heterogeneity rather than chance

### 3. Forest plot of high-intensity interval training versus control for homeostatic model assessment – insulin resistance (HOMA-IR)

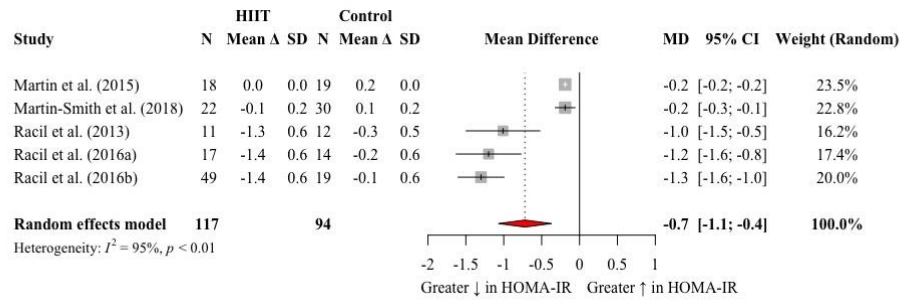

The mean difference between the change scores for high-intensity interval training (HIIT) and the control groups.

$N$  = number of participants

Mean  $\Delta$  = change score between pre- and post-tests

SD = standard deviation of the change score

MD = mean difference between the HIIT and control groups

CI = confidence interval

HOMA-IR = homeostatic model assessment – insulin resistance

$I^2$  = variation across studies due to heterogeneity rather than chance

### 4. Forest plot of high-intensity interval training versus control for triglycerides

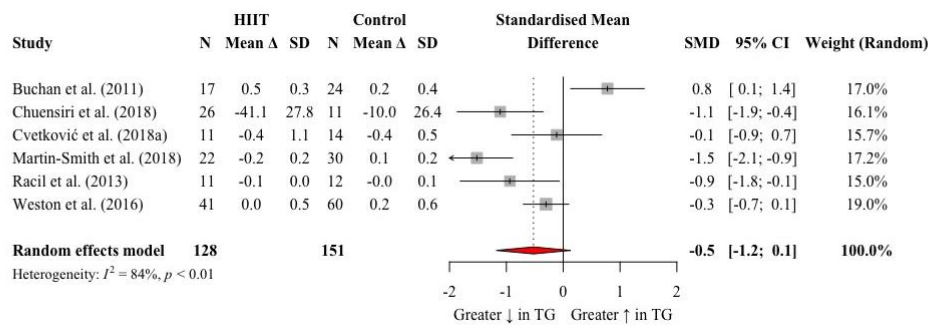

The standardised mean difference (SMD) between the change scores for high-intensity interval training (HIIT) and the control groups. SMD was used to account for different units of measurement presented.

$N$  = number of participants

Mean  $\Delta$  = change score between pre- and post-tests

SD = standard deviation of the change score

SMD = standardised mean difference between the HIIT and control groups

TG = triglycerides

CI = confidence interval

$I^2$  = variation across studies due to heterogeneity rather than chance

### 5. Forest plot of high-intensity interval training versus control for total cholesterol

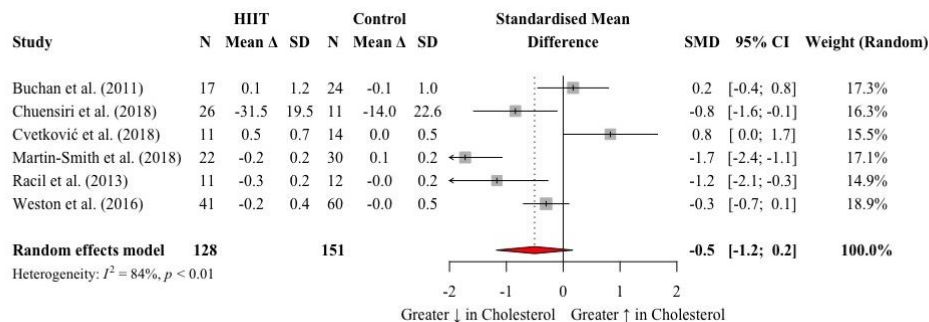

The standardised mean difference (SMD) between the change scores for high-intensity interval training (HIIT) and the control groups. SMD was used to account for different units of measurement presented.

$N$  = number of participants

Mean  $\Delta$  = change score between pre- and post-tests

SD = standard deviation of the change score

SMD = standardised mean difference between the HIIT and control groups

CI = confidence interval

I<sup>2</sup> = variation across studies due to heterogeneity rather than chance

## 6. Forest plot of high-intensity interval training versus control for total high-density lipoprotein

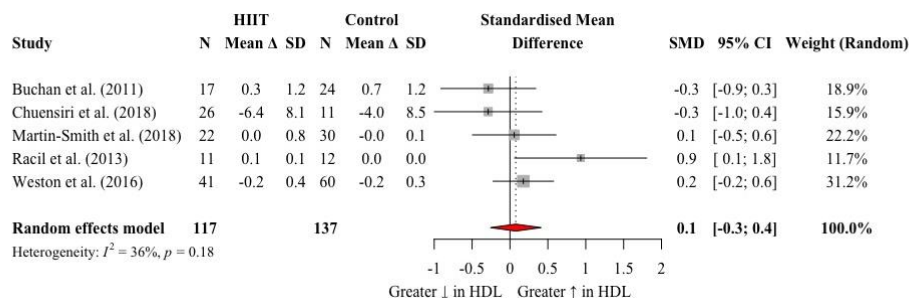

The standardised mean difference (SMD) between the change scores for high-intensity interval training (HIIT) and the control groups. SMD was used to account for different units of measurement presented.

N = number of participants

Mean Δ = change score between pre- and post-tests

SD = standard deviation of the change score

SMD = standardised mean difference between the HIIT and control groups

HDL = high-density lipoprotein

CI = confidence interval

I<sup>2</sup> = variation across studies due to heterogeneity rather than chance

## 7. Forest plot of high-intensity interval training versus control for total low-density lipoprotein

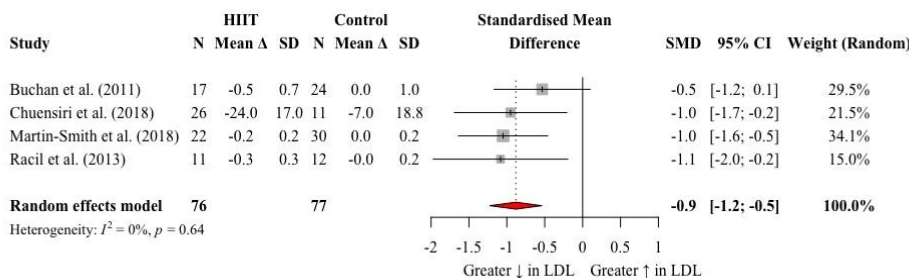

The standardised mean difference (SMD) between the change scores for high-intensity interval training (HIIT) and the control groups. SMD was used to account for different units of measurement presented.

N = number of participants

Mean Δ = change score between pre- and post-tests

SD = standard deviation of the change score

SMD = standardised mean difference between the HIIT and control groups

LDL = low-density lipoprotein

CI = confidence interval

I<sup>2</sup> = variation across studies due to heterogeneity rather than chance

# Aerobic and Muscular Fitness Forest Plots

## 1. Forest plot of high-intensity interval training versus control for all measurements of cardiorespiratory fitness

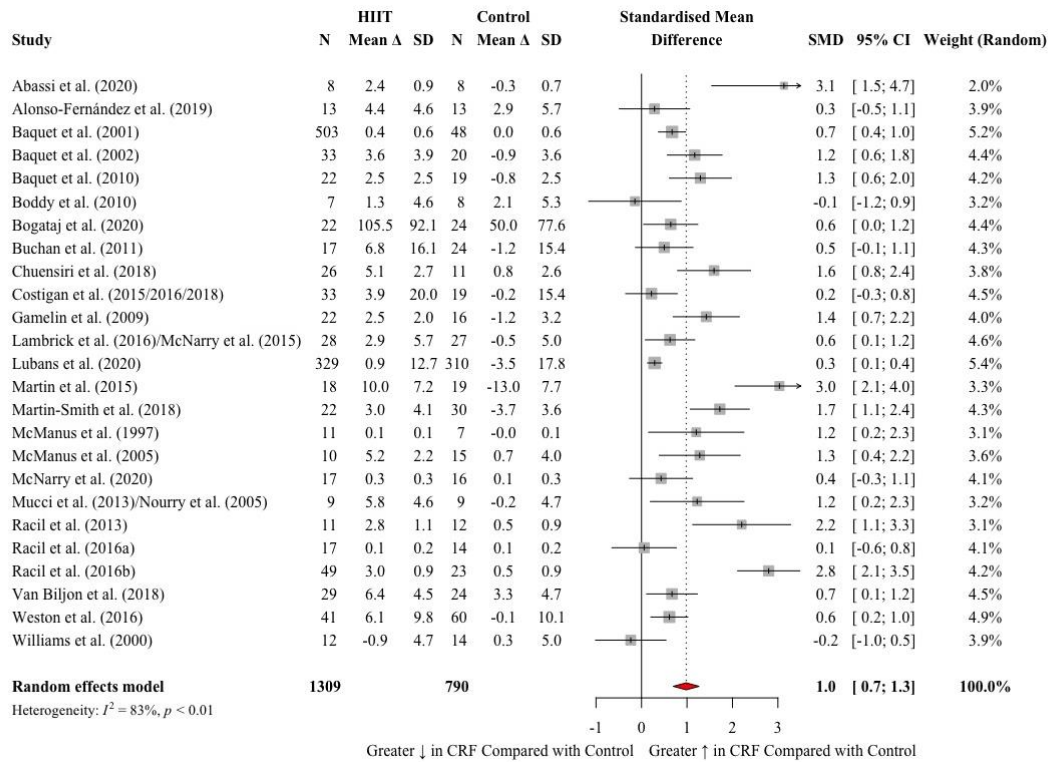

The standardised mean difference (SMD) between the change scores for high-intensity interval training (HIIT) and the control groups. SMD was used to account for different measures used to quantify cardiorespiratory fitness.

$N$  = number of participants

Mean  $\Delta$  = change score between pre- and post-tests

SD = standard deviation of the change score

SMD = standardised mean difference between the HIIT and control groups

CI = confidence interval

CRF = cardiorespiratory fitness

$I^2$  = variation across studies due to heterogeneity rather than chance

## 2. Forest plot of high-intensity interval training versus control for cardiorespiratory fitness measured using a metabolic cart to measure relative $VO_2$

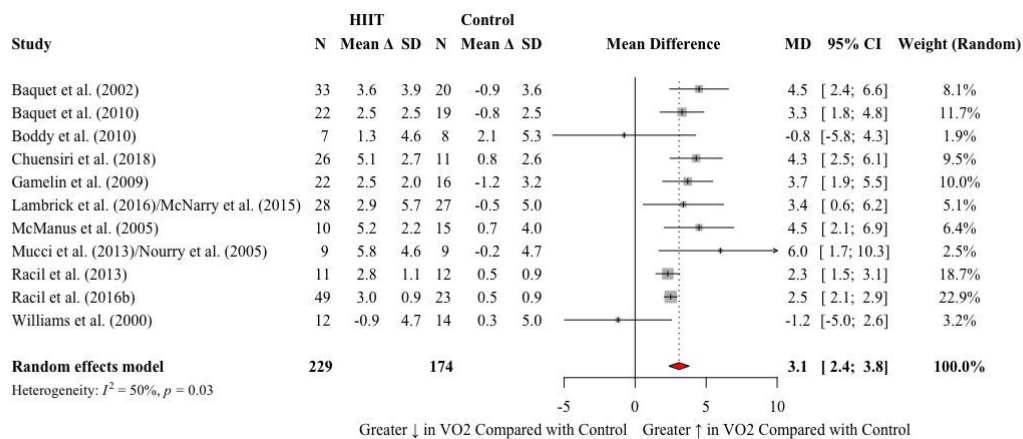

The mean difference between the change scores for high-intensity interval training (HIIT) and the control groups in ml/min/kg.

$N$  = number of participants

Mean  $\Delta$  = change score between pre- and post-tests



SD = standard deviation of the change score  
 MD = mean difference between the HIIT and control groups  
 VO<sub>2</sub> = maximum rate of oxygen consumption  
 I<sup>2</sup> = variation across studies due to heterogeneity rather than chance

### 3. Forest plot of high-intensity interval training versus control for cardiorespiratory fitness measured using number of shuttles completed in the 20 m shuttle run test

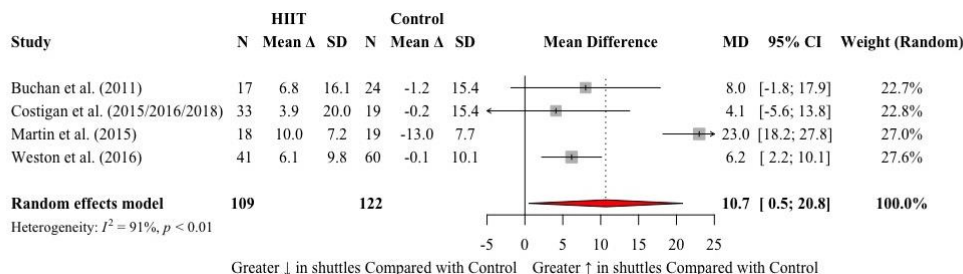

The mean difference between the change scores for high-intensity interval training (HIIT) and the control groups in number of shuttles.

N = number of participants  
 Mean Δ = change score between pre- and post-tests  
 SD = standard deviation of the change score  
 MD = mean difference between the HIIT and control groups  
 I<sup>2</sup> = variation across studies due to heterogeneity rather than chance

### 4. Forest plot of high-intensity interval training versus control for standing long jump

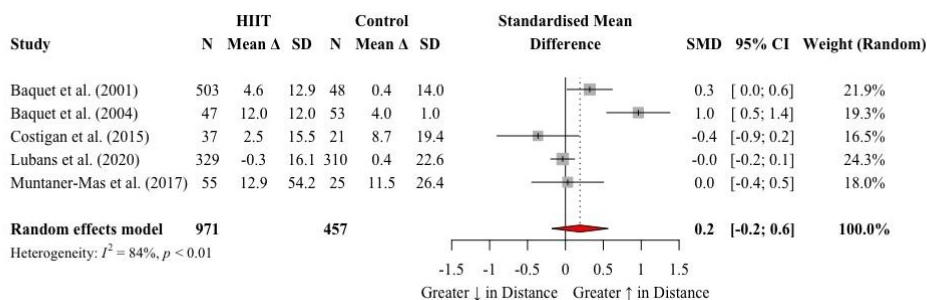

The standardised mean difference (SMD) between the change scores for high-intensity interval training (HIIT) and the control groups.

Mean Δ = change score between pre- and post-tests  
 SD = standard deviation of the change score  
 SMD = standardised mean difference between the HIIT and control groups  
 CI = confidence interval  
 I<sup>2</sup> = variation across studies due to heterogeneity rather than chance

### 5. Forest plot of high-intensity interval training versus control for countermovement jump

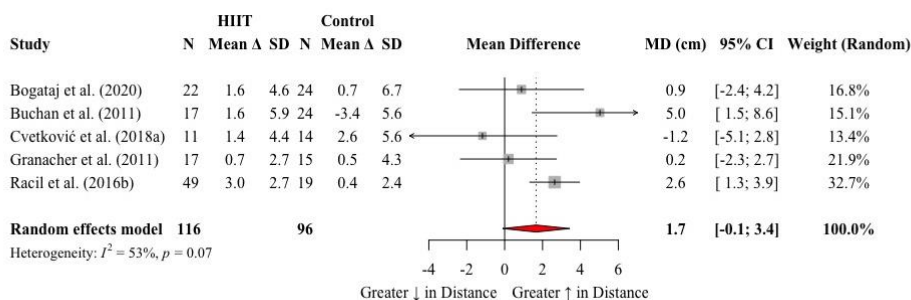

The mean difference between the change scores for high-intensity interval training (HIIT) and the control groups in centimetres

N = number of participants  
 Mean Δ = change score between pre- and post-tests

SD = standard deviation of the change score

MD = mean difference between the HIIT and control groups

CI = confidence interval

$I^2$  = variation across studies due to heterogeneity rather than chance
